# Supplementary material for: Microalgae aqueous extracts exert intestinal protective effects in Caco-2 cells and dextran sodium sulphate-induced mouse colitis
Source: Royal Society of Chemistry journal article supplement (doi:10.1039/c9fo01028a), 2019-12-02
Supplement: c9fo01028a1.pdf [file c9fo01028a1.pdf]

## Supplementary Information

### **Microalgae Aqueous Extracts Exert Intestinal Protective Effects in Caco-2 Cells and Dextran Sodium Sulphate-Induced Mouse Colitis**

Wei Guo,<sup>a</sup> Suqin Zhu,<sup>a</sup> Guangxin Feng,<sup>a</sup> Lingyu Wu,<sup>a</sup> Yinong Feng,<sup>a</sup> Tengjiao Guo,<sup>a</sup> Yisheng Yang,<sup>a</sup>

Haohao Wu<sup>\*a</sup> and Mingyong Zeng<sup>\*a</sup>

<sup>a</sup> College of Food Science and Engineering, Ocean University of China, 5 Yushan Road, Qingdao,

Shandong Province, 266003, China

\* E-mails: [wuhaohao@ouc.edu.cn](mailto:wuhaohao@ouc.edu.cn) (Wu, H.); [mingyz@ouc.edu.cn](mailto:mingyz@ouc.edu.cn) (Zeng, M.); Tel.: +86-532-8203-2400

(Wu, H.); +86-532-8203-2783 (Zeng, M.).

## 11 **Method**

### 12 **MTT Assay**

13 To assay the cytotoxicity of MAEs in Caco-2 cells, wells were set up with each containing  $1 \times 10^4$  cells in a 96-well  
14 plate. Cells were cultured for 24 h and treated with 8  $\mu\text{g/mL}$  MAEs in complete medium for another 24 h. The  
15 MTT solution (0.5 mg/mL in DMEM) was then added and the plate was incubated for further 4 h. Following  
16 medium removing, 150  $\mu\text{L}$  DMSO was added to each well and the plate was agitated for 10 min on a plate shaker.  
17 The absorbance was measured at 570 nm.

19 **Table S1** The criteria for DAI

| Score | Weight loss | Stool consistency | Rectal bleeding  |
|-------|-------------|-------------------|------------------|
| 0     | None        | Normal stools     | Negative         |
| 1     | 1-5%        | Soft stools       | Negative         |
| 2     | 6-10%       | Soft stools       | Positive         |
| 3     | 11-15%      | Very soft         | Visible in stool |
| 4     | > 15%       | Watery stool      | Gross bleeding   |

20

21 **Table S2** Chemical Compositions of the Microalgae Powders

|                                   | Protein                 | Lipid                   | Total carbohydrate      | Ash                     |
|-----------------------------------|-------------------------|-------------------------|-------------------------|-------------------------|
| <i>Chlorella pyrenoidosa</i>      | 59.36±0.44 <sup>b</sup> | 14.82±0.33 <sup>a</sup> | 14.20±0.44 <sup>a</sup> | 7.09±0.17 <sup>b</sup>  |
| <i>Spirulina platensis</i>        | 67.25±0.52 <sup>a</sup> | 9.10±0.15 <sup>b</sup>  | 11.56±0.44 <sup>b</sup> | 5.97±0.20 <sup>c</sup>  |
| <i>Synechococcus</i> sp. PCC 7002 | 65.79±0.20 <sup>a</sup> | 8.21±0.35 <sup>b</sup>  | 9.30±0.28 <sup>c</sup>  | 13.23±0.21 <sup>a</sup> |

22 Data were expressed in % of dry weight (means ± standard deviations, n = 3). Different superscript  
 23 letters (a-c) in the same column denote statistically significant differences ( $p < 0.05$ ).

24

25 **Figure S1** Viabilities of Caco-2 cells following an incubation with 8 µg/mL of MAEs for 24 h. Data were expressed as  
26 means ± standard deviations (n = 6).

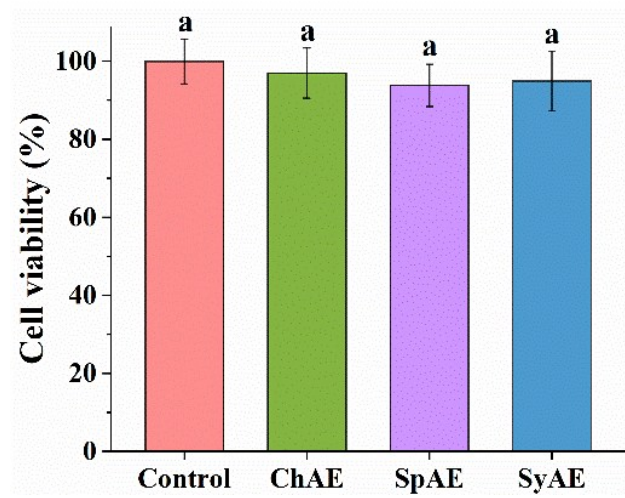

27
